# Supplementary material for: The influence of ceria on Cu/TiO2 catalysts to produce abundant oxygen vacancies and induce highly efficient CO oxidation
Source: Royal Society of Chemistry journal article supplement (doi:10.1039/d0cy00792g), 2020-01-01
Supplement: d0cy00792g1.pdf [file d0cy00792g1.pdf]

**The influence of ceria on Cu/TiO<sub>2</sub> catalysts to produce abundant oxygen  
vacancies and induce highly efficient CO oxidation**

Ching-Shiun Chen<sup>a,b\*</sup>, Tse-Ching Chen<sup>b</sup>, Hung-Chi Wu<sup>a</sup>, Jia-Huang Wu<sup>a</sup>, Jyh-Fu Lee<sup>c</sup>

<sup>a</sup>Center for General Education, Chang Gung University, 259, Wen-Hua 1st Rd,

Guishan Dist, Taoyuan City 33302, Taiwan, Republic of China.

\*E-mail: cschen@mail.cgu.edu.tw

<sup>b</sup>Department of Pathology, Chang Gung Memorial Hospital Linkou, 5, Fusing St,

Guishan Dist, Taoyuan City 33302, Taiwan, Republic of China

<sup>c</sup>National Synchrotron Radiation Research Center, Hsinchu 30076, Taiwan, Republic  
of China

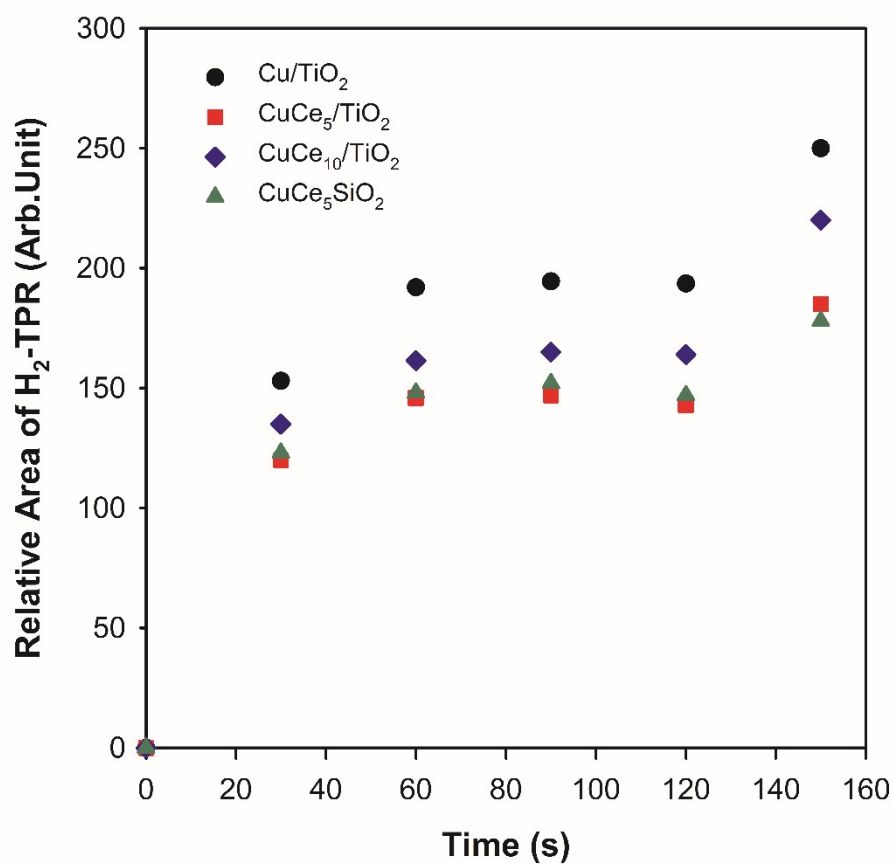

**Fig. S1** Dependence of the relative area of H<sub>2</sub>-TPR experiments for the reduced Cu/TiO<sub>2</sub>, CuCe<sub>x</sub>/TiO<sub>2</sub> and CuCe<sub>5</sub>/SiO<sub>2</sub> samples versus the different oxidation time.

The as-impregnated Cu samples was calcined in air stream and reduced in H<sub>2</sub> at 573 K for 5 h, respectively. The reduced Cu samples were oxidized by a 10% N<sub>2</sub>O/N<sub>2</sub> stream at 343 K.

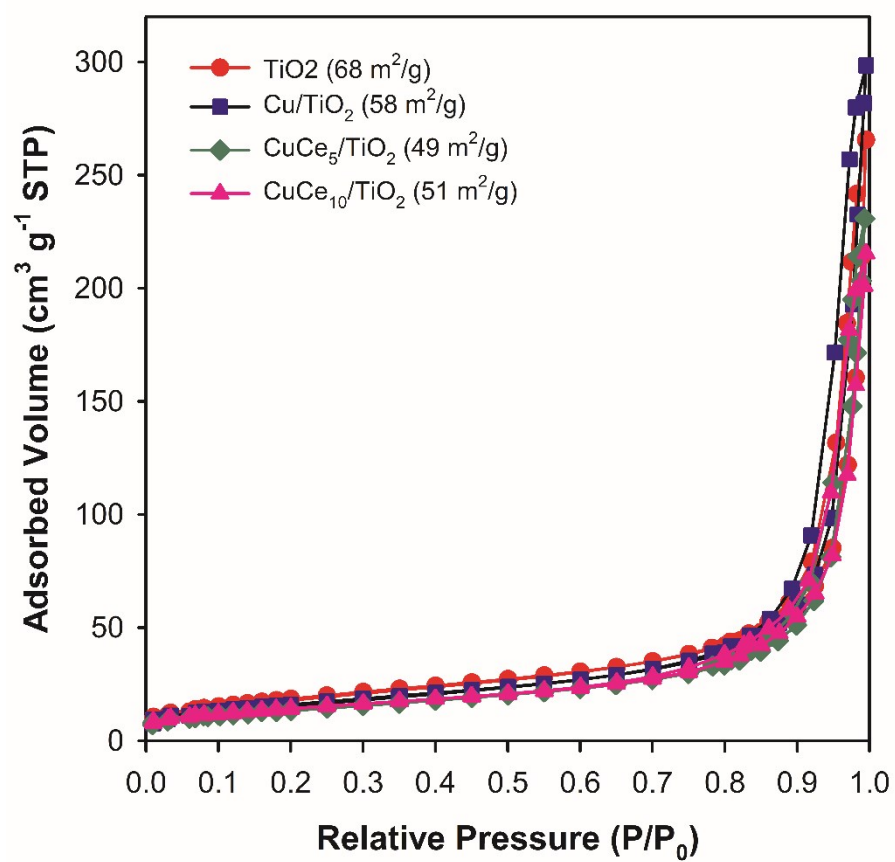

**Fig. S2** N<sub>2</sub> adsorption-desorption isotherms of the TiO<sub>2</sub>, Cu/TiO<sub>2</sub> and CuCe<sub>x</sub>/TiO<sub>2</sub> catalysts.

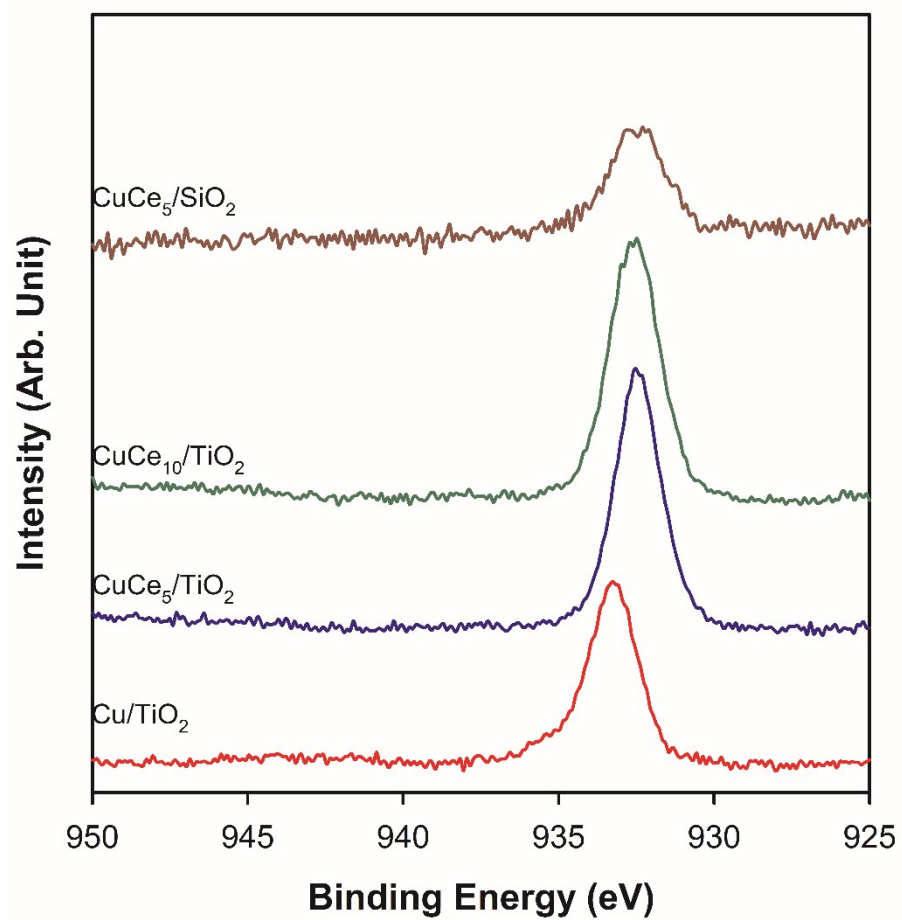

**Fig. S3** XPS spectra of Cu 2p<sub>3/2</sub> for the Cu/TiO<sub>2</sub>, CuCe<sub>x</sub>/TiO<sub>2</sub> and CuCe<sub>5</sub>/SiO<sub>2</sub> samples.

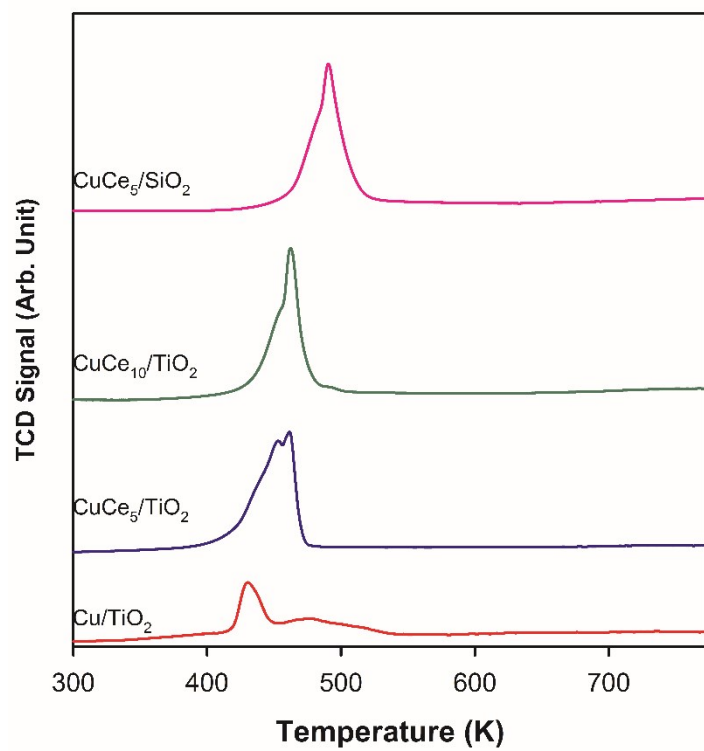

**Fig. S4** H<sub>2</sub>-TPR profiles of the calcined Cu/TiO<sub>2</sub>, CuCe<sub>x</sub>/TiO<sub>2</sub> and CuCe<sub>5</sub>/SiO<sub>2</sub>

samples. The as-impregnated Cu samples was calcined in air stream at 573 K for 5 h.

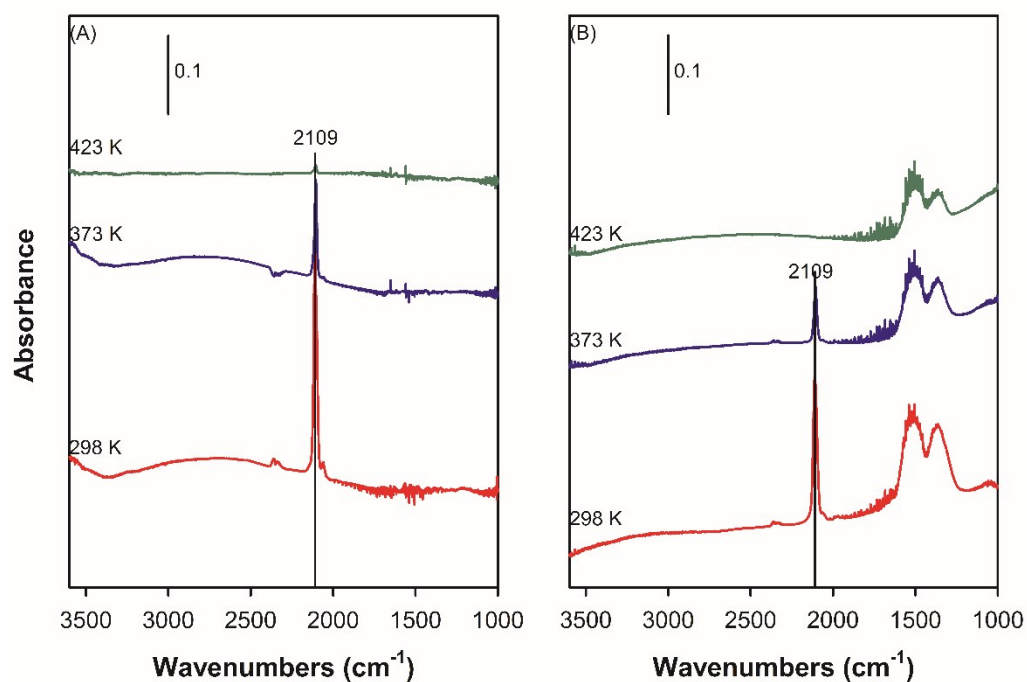

**Fig. S5** Temperature-dependent IR spectra of CO adsorbed onto the reduced (A) Cu/TiO<sub>2</sub> and (B) CuCe<sub>10</sub>/TiO<sub>2</sub> samples. CO adsorptions were performed via exposure to a 20 mL/min pure CO stream for 30 min at room temperature, followed by a 20 mL/min helium stream for 50 min to purge the CO gas.

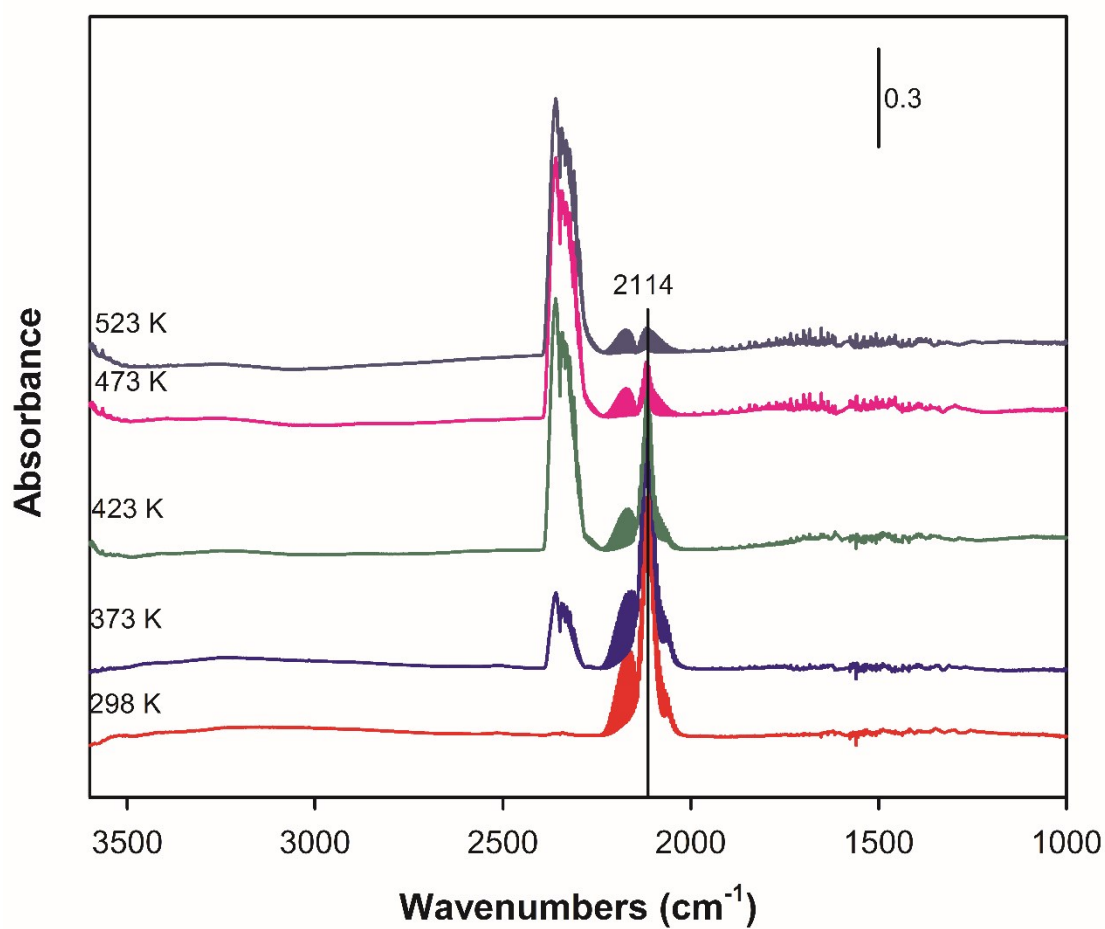

**Fig. S6** Temperature-dependent IR spectra of a CO/air stream adsorbed on the reduced Cu/TiO<sub>2</sub>. A gaseous mixture of 4.5% CO and 2.23% O<sub>2</sub> with a flow rate of 50 mL/min was passed through 50 mg of catalyst over the course of CO oxidation.

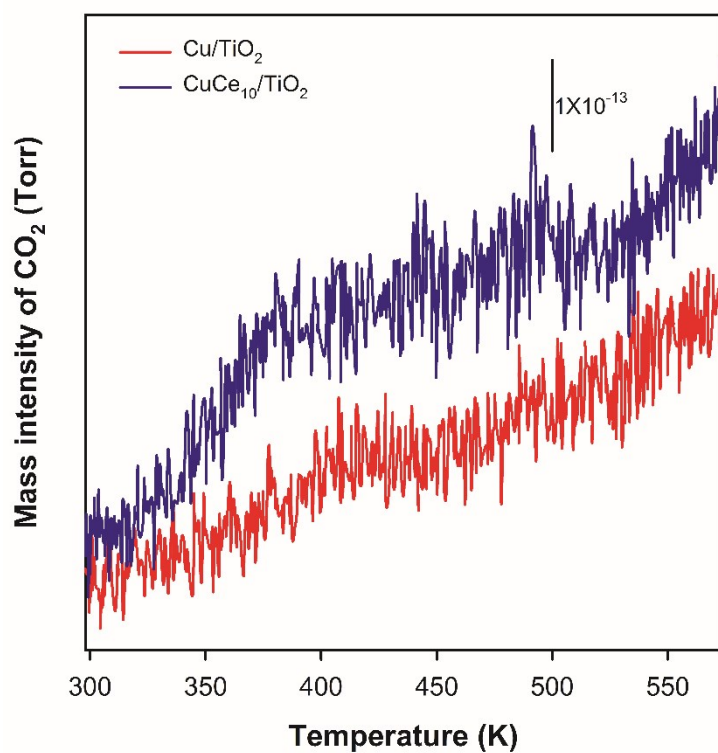

**Fig. S7** CO-TPR plots of CO<sub>2</sub> desorbed from the reduced CuCe<sub>10</sub>/TiO<sub>2</sub> and Cu/TiO<sub>2</sub> samples in a 100 mL/min CO stream with a 10 K/min heating rate.
